# Supplementary material
Source: PubMed Central journal article supplement (PMC6238606)
Supplement: Supp_Fig1.pdf [file Supp_Fig1.pdf]

## Supplementary Data

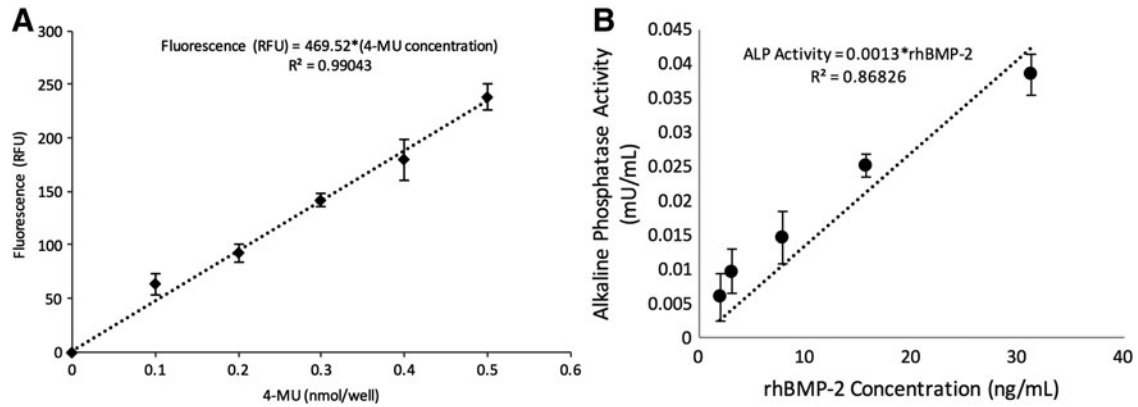

**SUPPLEMENTARY FIG. S1.** (A) Fluorescence activity as a function of substrate concentration for a constant amount of alkaline phosphatase enzyme. (B) Alkaline phosphatase activity (mU/mL) as a function of rhBMP-2 concentration and used for Figure 2B. Error bars indicate standard error of the mean ( $n=3$ ). rhBMP-2, recombinant human bone morphogenetic protein 2.
