# Supplementary material
Source: PubMed Central journal article supplement (PMC6238606)
Supplement: Supp_Fig2.pdf [file Supp_Fig2.pdf]

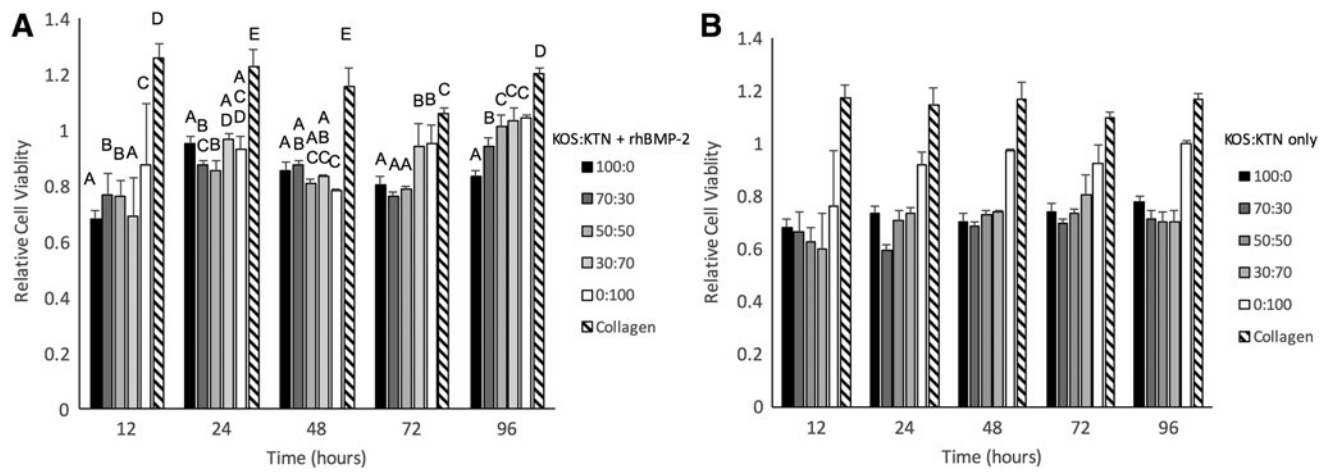

**SUPPLEMENTARY FIG. S2.** Relative viability of MC3T3-E1 cells in response to keratin or collagen releasates either (A) with rhBMP-2 or (B) without rhBMP-2. These data were used for normalization of cell viability in Figure 2A. Groups with same letters indicate no statistical difference ( $p > 0.05$ ); otherwise the groups were statistically different, as determined by Tukey's test. Error bars indicate standard error of the mean ( $n = 3$ ).
