# Supplementary material
Source: PubMed Central journal article supplement (PMC6238606)
Supplement: Supp_Fig3.pdf [file Supp_Fig3.pdf]

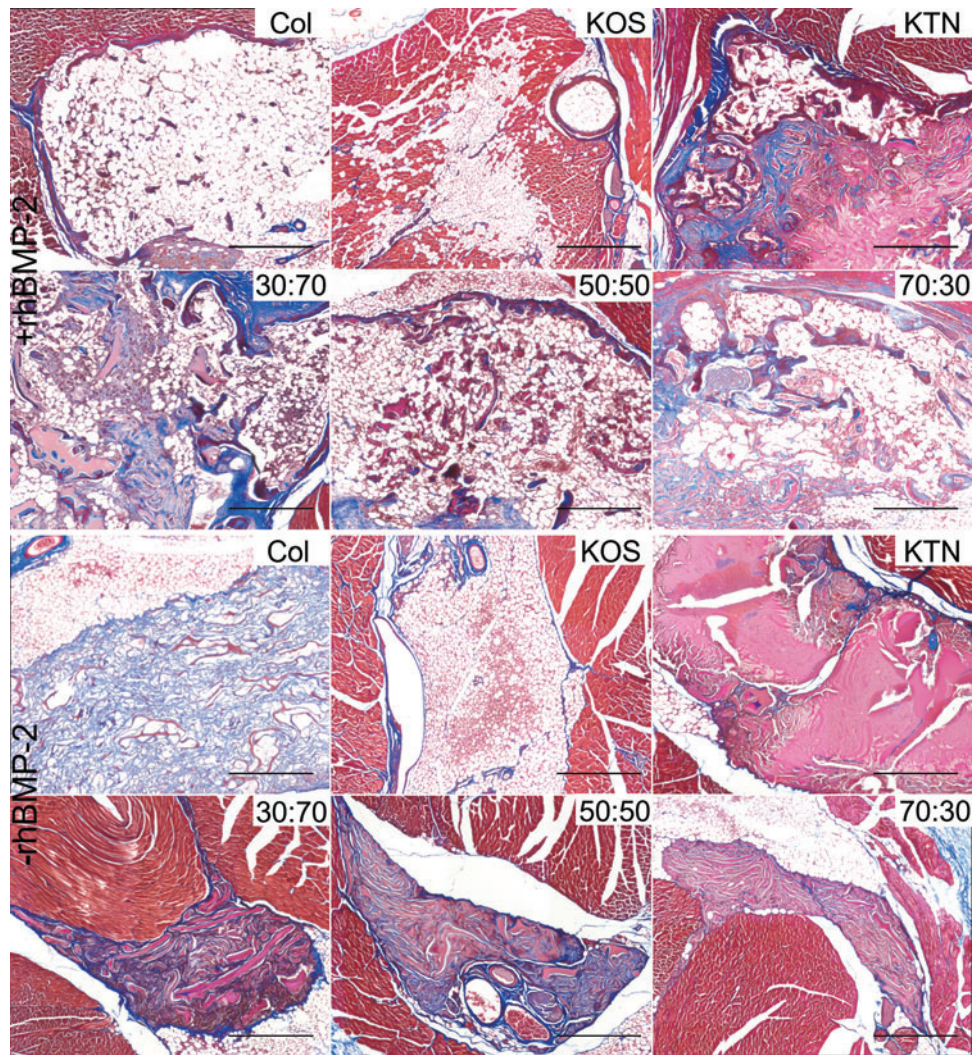

**SUPPLEMENTARY FIG. S3.** Representative Masson's Trichrome staining images of explanted tissue from the mouse heterotopic bone growth model for keratin hydrogels or collagen sponges with (+rhBMP-2) or without (–rhBMP-2). Keratin formulations are indicated as KOS:KTN ratio by weight percentage. In this method, nuclei are stained *black*; cytoplasm, muscle fibers, and keratin are stained *red*; collagen and mucus are stained *blue*. KOS, keratose; KTN, keratine. Scale bars indicate 1 mm.
