# Supplementary material
Source: PubMed Central journal article supplement (PMC6238606)
Supplement: Supp_Table1.pdf [file Supp_Table1.pdf]

SUPPLEMENTARY TABLE S1. TYPICAL FORMULATION FOR TUNABLE KERATIN HYDROGELS

| <i>Formulation<br/>(KOS:KTN)</i> | <i>Mass of<br/>KOS, mg</i> | <i>Mass of<br/>KTN, mg</i> | <i>Total mass<br/>of keratin, mg</i> | <i>Volume of water or<br/>100 µg/mL rhBMP-2 in water, mL</i> |
|----------------------------------|----------------------------|----------------------------|--------------------------------------|--------------------------------------------------------------|
| 100:0                            | 150                        | 0                          | 150                                  | 1                                                            |
| 70:30                            | 105                        | 45                         | 150                                  | 1                                                            |
| 50:50                            | 75                         | 75                         | 150                                  | 1                                                            |
| 30:70                            | 45                         | 105                        | 150                                  | 1                                                            |
| 0:100                            | 0                          | 150                        | 150                                  | 1                                                            |

KOS, keratose; KTN, kerateine; rhBMP-2, recombinant human bone morphogenetic protein 2.
